# Supplementary material for: Near Infrared Spectroscopy Based on Supervised Pattern Recognition Methods for Rapid Identification of Adulterated Edible Gelatin
Source: Hindawi journal article supplement (doi:10.1155/2018/7652592), 2018-12-20
Supplement: f1 [file 7652592.f1.doc]

**Supplementary materials**

### Near infrared spectroscopy based on supervised pattern recognition methods for rapid identification of adulterated edible gelatin

Hao Zhanga*, Haifeng Suna, Ling Wanga, Shun Wang, Wei Zhanga, Jiandong Hua,b

aCollege of Mechanical and Electrical Engineering, Henan Agricultural University, Zhengzhou, 450002, China

bState Key Laboratory of Wheat and Maize Crop Science, Zhengzhou, 45002, China

*Email address: [hao.zhang2016@hotmail.com](mailto:hao.zhang2016@hotmail.com).

Phone: (+86) 15736711926

Table S1 List of the used gelatin samples

| Type | Color | Origin | Ingredient | Application |
| --- | --- | --- | --- | --- |
| Edible gelatin | Faint yellow | Fresh pig skin | Protein (85%), water (11.4%), ash (0.49%), As (0.015mg/kg), Cr (0.71 mg/kg), Pb (0.5mg/ kg) | Food additives for jelly, yogurt, galantine, soft sweets, ice cream, and so on |
| Industrial gelatin | Brown | - | Protein (80%), water and mineral salts (14%), ash (1~2%) | Binding agents for packing, furniture, papermaking, printing, and son on |

Table S2 A total of 114 gelatin samples in the training set and validation set

| Class | Samples | Training set | Validation set | Total |
| --- | --- | --- | --- | --- |
| 1 | Pure edible gelatin | R3, R5, R6, R7, R8, R11, R14, R16, R17 | R1, R2, R4, R9, R10, R12, R13, R15, R18, R19, R20 | 20 |
| 2 | 4: 1 adulterated gelatin | R21, R22, R25, R28, R29, R30, R32, R33, R34, R35, R37, R38, R40 | R23, R24, R26, R27, R31, R36, R39 | 20 |
| 3 | 3.2 adulterated gelatin | R41, R42, R45, R46, R47, R48, R51, R52, R53, R54, R55, R56, R58 | R43, R44, R49, R50, R57 | 18 |
| 4 | 2: 3 adulterated gelatin | R59, R60, R62, R63, R67, R68, R69, R70, R72, R74, R76, R77, R78 | R61, R64, R65, R66, R71, R73, R75 | 20 |
| 5 | 1: 4 adulterated gelatin | R79, R80, R81, R83, R84, R86, R89, R90, R91, R92, R93, R96 | R82, R85, R87, R88, R94,R95 | 18 |
| 6 | Pure industrial gelatin | R97, R98, R99, R100, R101, R103, R104, R105, R106, R107, R108, R109, R111, R112, R113 | R102, R110, R114 | 18 |
| Total number | | 75 | 39 | 114 |


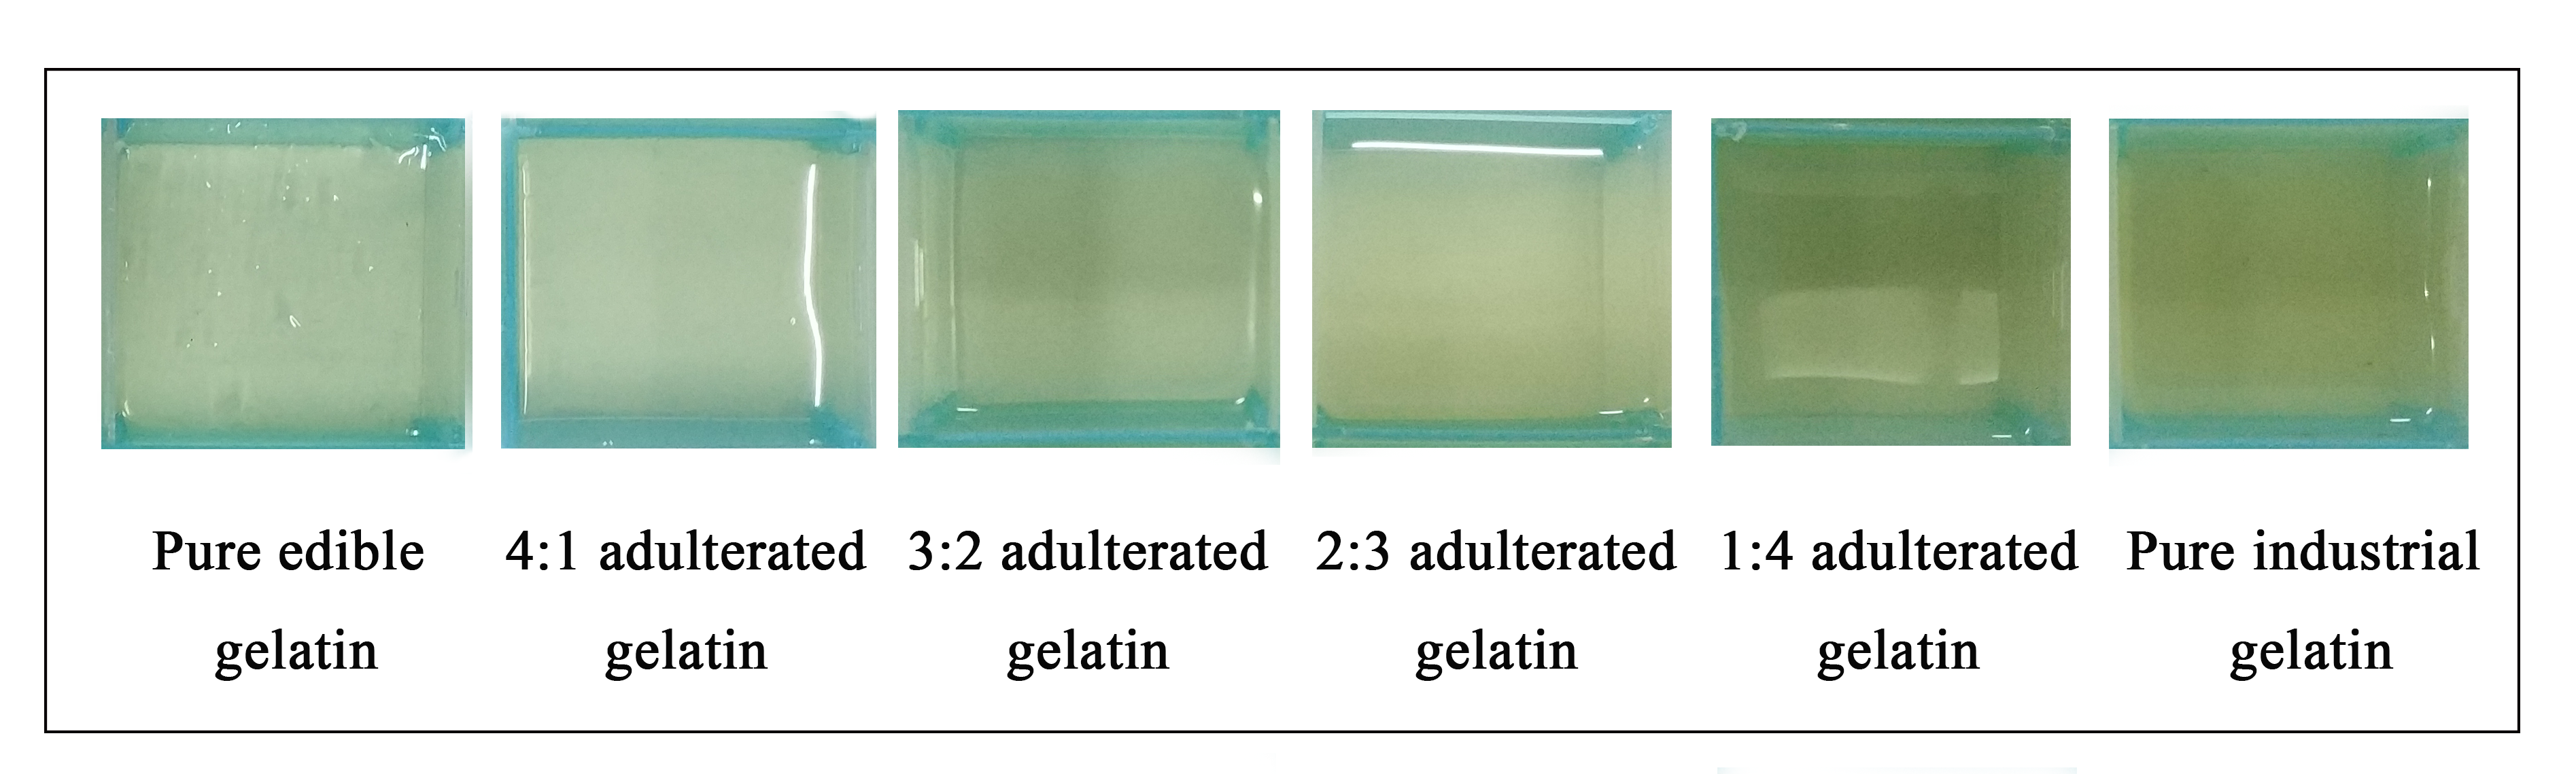


Figure S1 Gelatin samples prepared for NIR spectral measurements

Table S3 The results of LDA model in the validation set

| Sample-Class | 1 | 2 | 3 | 4 | 5 | 6 | Predicted class |
| --- | --- | --- | --- | --- | --- | --- | --- |
| R1 | -6.441459 | -66.25657 | -195.5446 | -320.9603 | -728.1512 | -1398.766 | 1 |
| R2 | -9.714035 | -64.48491 | -200.5948 | -329.0325 | -732.8486 | -1404.865 | 1 |
| R4 | -5.096142 | -58.00997 | -174.6178 | -298.949 | -687.1669 | -1353.667 | 1 |
| R9 | -6.456046 | -73.53759 | -219.8061 | -353.2862 | -780.8055 | -1486.74 | 1 |
| R10 | -7.276218 | -83.54485 | -210.6061 | -341.7043 | -772.1918 | -1482.879 | 1 |
| R12 | -26.70993 | -29.67816 | -77.0083 | -162.2755 | -470.9856 | -1058.482 | 1 |
| R13 | -6.561794 | -57.45572 | -160.3648 | -273.381 | -678.5373 | -1366.627 | 1 |
| R15 | -30.83763 | -24.55244 | -78.32844 | -159.0544 | -464.5663 | -1042.634 | 2 |
| R18 | -15.00259 | -124.6044 | -226.5591 | -361.1808 | -774.6669 | -1475.722 | 1 |
| R19 | -15.9317 | -88.79115 | -181.5116 | -300.4759 | -647.1964 | -1285.224 | 1 |
| R20 | -4.66997 | -66.00881 | -173.0322 | -292.2107 | -689.3694 | -1377.149 | 1 |
| R23 | -45.19707 | -7.628939 | -72.76608 | -150.9467 | -468.7676 | -1045.069 | 2 |
| R24 | -81.4457 | -7.888279 | -99.49632 | -167.7374 | -495.9 | -1092.273 | 2 |
| R26 | -77.50063 | -5.192938 | -75.05087 | -141.7098 | -450.6451 | -1019.172 | 2 |
| R27 | -72.95142 | -6.05127 | -72.74981 | -142.0614 | -448.4103 | -1011.933 | 2 |
| R31 | -61.35455 | -4.567707 | -74.04041 | -143.2105 | -469.0017 | -1052.185 | 2 |
| R36 | -54.26124 | -5.363132 | -75.04991 | -144.0263 | -467.3988 | -1037.651 | 2 |
| R39 | -64.42031 | -5.047444 | -70.63207 | -132.1893 | -449.0388 | -1016.361 | 2 |
| R43 | -234.7515 | -103.3748 | -7.809797 | -16.46146 | -198.5221 | -591.9695 | 3 |
| R44 | -189.4592 | -84.63382 | -2.898908 | -23.31049 | -233.674 | -663.529 | 3 |
| R49 | -231.5915 | -103.8831 | -8.493041 | -18.55524 | -190.7392 | -575.7926 | 3 |
| R50 | -184.9557 | -76.41074 | -6.601046 | -22.65832 | -204.6581 | -619.4713 | 3 |
| R57 | -196.0731 | -89.79376 | -3.849785 | -16.19486 | -196.5863 | -609.6458 | 3 |
| R61 | -286.767 | -148.3097 | -20.06625 | -5.242836 | -136.5545 | -490.204 | 4 |
| R64 | -313.152 | -162.5962 | -27.85121 | -4.690495 | -136.8535 | -494.4701 | 4 |
| R65 | -330.987 | -180.276 | -31.42186 | -9.991709 | -115.1821 | -438.5115 | 4 |
| R66 | -312.6839 | -162.5051 | -26.17223 | -7.187786 | -128.7022 | -469.6866 | 4 |
| R71 | -284.8464 | -137.1666 | -24.54281 | -3.105531 | -142.988 | -511.0504 | 4 |
| R73 | -281.2536 | -125.4234 | -28.39897 | -5.582948 | -154.1644 | -535.3267 | 4 |
| R75 | -269.2165 | -129.8348 | -18.97853 | -4.772975 | -150.6456 | -542.8186 | 4 |
| R82 | -677.6171 | -448.4083 | -207.4755 | -120.9614 | -5.061496 | -157.8954 | 5 |
| R85 | -690.0771 | -451.5016 | -214.2393 | -122.3161 | -4.493619 | -147.4977 | 5 |
| R87 | -666.4904 | -436.2831 | -200.545 | -112.8998 | -4.701206 | -162.842 | 5 |
| R88 | -697.3259 | -453.2327 | -217.4461 | -124.0809 | -5.552019 | -147.5842 | 5 |
| R94 | -693.0449 | -482.9328 | -242.9137 | -149.9291 | -5.59895 | -141.3358 | 5 |
| R95 | -679.7356 | -477.2456 | -235.4963 | -145.5511 | -5.808595 | -153.6628 | 5 |
| R102 | -1410.709 | -1088.052 | -697.3475 | -536.0814 | -166.2526 | -4.554019 | 6 |
| R110 | -1400.919 | -1069.907 | -692.4928 | -524.7183 | -160.1046 | -6.196105 | 6 |
| R114 | -1378.54 | -1050.269 | -673.1971 | -508.691 | -147.763 | -5.317752 | 6 |

Table S4 The results of SIMCA model in the training set when the significance level α = 0.05

| Sample - Class | 1 | 2 | 3 | 4 | 5 | 6 | Sample - Class | 1 | 2 | 3 | 4 | 5 | 6 |
| --- | --- | --- | --- | --- | --- | --- | --- | --- | --- | --- | --- | --- | --- |
| R3 | ***** |  |  |  |  |  | R63 |  |  |  | * |  |  |
| R5 | ***** |  |  |  |  |  | R67 |  |  |  | * |  |  |
| R6 | ***** |  |  |  |  |  | R68 |  |  |  | * |  |  |
| R7 | ***** |  |  |  |  |  | R69 |  |  |  | * |  |  |
| R8 | ***** |  |  |  |  |  | R70 |  |  |  | * |  |  |
| R11 | ***** |  |  |  |  |  | R72 |  |  |  | * |  |  |
| R14 | ***** |  |  |  |  |  | R74 |  |  |  | * |  |  |
| R16 | ***** |  |  |  |  |  | R76 |  |  |  | * |  |  |
| R17 | ***** |  |  |  |  |  | R77 |  |  |  | * |  |  |
| R21 | ***** | * |  |  |  |  | R78 |  |  |  | * |  |  |
| R22 | ***** | * |  |  |  |  | R79 |  |  |  |  | * |  |
| R25 | ***** | * |  |  |  |  | R80 |  |  |  |  | * |  |
| R28 | ***** | * |  |  |  |  | R81 |  |  |  |  | * |  |
| R29 | ***** | * |  |  |  |  | R83 |  |  |  |  | * |  |
| R30 | ***** | * |  |  |  |  | R84 |  |  |  |  | * |  |
| R32 |  | * |  |  |  |  | R86 |  |  |  |  | * |  |
| R33 |  | * |  |  |  |  | R89 |  |  |  |  | * |  |
| R34 |  | * |  |  |  |  | R90 |  |  |  |  | * |  |
| R35 |  | * |  |  |  |  | R91 |  |  |  |  | * |  |
| R37 |  | * |  |  |  |  | R92 |  |  |  |  | * |  |
| R38 |  | * |  |  |  |  | R93 |  |  |  |  | * |  |
| R40 |  | * |  |  |  |  | R96 |  |  |  |  | * |  |
| R41 |  |  | * |  |  |  | R97 |  |  |  |  |  | * |
| R42 |  |  | * |  |  |  | R98 |  |  |  |  |  | * |
| R45 |  |  | * |  |  |  | R99 |  |  |  |  |  | * |
| R46 |  |  | * |  |  |  | R100 |  |  |  |  |  | * |
| R47 |  |  | * |  |  |  | R101 |  |  |  |  |  | * |
| R48 |  |  | * |  |  |  | R103 |  |  |  |  |  | * |
| R51 |  |  | * |  |  |  | R104 |  |  |  |  |  | * |
| R52 |  |  | * |  |  |  | R105 |  |  |  |  |  | * |
| R53 |  |  | * |  |  |  | R106 |  |  |  |  |  | * |
| R54 |  |  | * |  |  |  | R107 |  |  |  |  |  | * |
| R55 |  |  | * |  |  |  | R108 |  |  |  |  |  | * |
| R56 |  |  | * |  |  |  | R109 |  |  |  |  |  | * |
| R58 |  |  | * |  |  |  | R111 |  |  |  |  |  | * |
| R59 |  |  |  | * |  |  | R112 |  |  |  |  |  | * |
| R60 |  |  |  | * |  |  | R113 |  |  |  |  |  | * |
| R62 |  |  |  | * |  |  |  |  |  |  |  |  |  |

Table S5 The results of SIMCA model in the validation set when the significance level α = 0.05

| Sample - Class | 1 | 2 | 3 | 4 | 5 | 6 | Sample - Class | 1 | 2 | 3 | 4 | 5 | 6 |
| --- | --- | --- | --- | --- | --- | --- | --- | --- | --- | --- | --- | --- | --- |
| R1 | * |  |  |  |  |  | R49 |  |  | * |  |  |  |
| R2 | * |  |  |  |  |  | R50 |  |  | * |  |  |  |
| R4 | * |  |  |  |  |  | R57 |  |  | * |  |  |  |
| R9 | * |  |  |  |  |  | R61 |  |  |  | * |  |  |
| R10 | * |  |  |  |  |  | R64 |  |  |  | * |  |  |
| R12 | * |  |  |  |  |  | R65 |  |  |  | * |  |  |
| R13 | * |  |  |  |  |  | R66 |  |  |  | * |  |  |
| R15 | * |  |  |  |  |  | R71 |  |  |  | * |  |  |
| R18 | * |  |  |  |  |  | R73 |  |  |  | * |  |  |
| R19 | * |  |  |  |  |  | R75 |  |  |  | * |  |  |
| R20 | * |  |  |  |  |  | R82 |  |  |  |  | * |  |
| R23 | * | * |  |  |  |  | R85 |  |  |  |  | * |  |
| R24 | * | * |  |  |  |  | R87 |  |  |  |  | * |  |
| R26 | * | * |  |  |  |  | R88 |  |  |  |  | * |  |
| R27 | * | * |  |  |  |  | R94 |  |  |  |  | * |  |
| R31 | * | * |  |  |  |  | R95 |  |  |  |  | * |  |
| R36 |  | * |  |  |  |  | R102 |  |  |  |  |  | * |
| R39 |  | * |  |  |  |  | R110 |  |  |  |  |  | * |
| R43 |  |  | * |  |  |  | R114 |  |  |  |  |  | * |
| R44 |  |  | * |  |  |  |  |  |  |  |  |  |  |

Table S6 The results of SIMCA model in the training set when the significance level α = 0.1

| Sample - Class | 1 | 2 | 3 | 4 | 5 | 6 | Sample - Class | 1 | 2 | 3 | 4 | 5 | 6 |
| --- | --- | --- | --- | --- | --- | --- | --- | --- | --- | --- | --- | --- | --- |
| R3 | ***** |  |  |  |  |  | R63 |  |  |  | * |  |  |
| R5 | ***** |  |  |  |  |  | R67 |  |  |  | * |  |  |
| R6 | ***** |  |  |  |  |  | R68 |  |  |  | * |  |  |
| R7 | ***** |  |  |  |  |  | R69 |  |  |  | * |  |  |
| R8 | ***** |  |  |  |  |  | R70 |  |  |  | * |  |  |
| R11 | ***** |  |  |  |  |  | R72 |  |  |  | * |  |  |
| R14 | ***** |  |  |  |  |  | R74 |  |  |  | * |  |  |
| R16 | ***** |  |  |  |  |  | R76 |  |  |  | * |  |  |
| R17 | ***** |  |  |  |  |  | R77 |  |  |  | * |  |  |
| R21 | ***** | * |  |  |  |  | R78 |  |  |  | * |  |  |
| R22 |  | * |  |  |  |  | R79 |  |  |  |  | * |  |
| R25 |  | * |  |  |  |  | R80 |  |  |  |  | * |  |
| R28 |  | * |  |  |  |  | R81 |  |  |  |  | * |  |
| R29 |  | * |  |  |  |  | R83 |  |  |  |  | * |  |
| R30 |  | * |  |  |  |  | R84 |  |  |  |  | * |  |
| R32 |  | * |  |  |  |  | R86 |  |  |  |  | * |  |
| R33 |  | * |  |  |  |  | R89 |  |  |  |  | * |  |
| R34 |  | * |  |  |  |  | R90 |  |  |  |  | * |  |
| R35 |  | * |  |  |  |  | R91 |  |  |  |  | * |  |
| R37 |  | * |  |  |  |  | R92 |  |  |  |  | * |  |
| R38 |  | * |  |  |  |  | R93 |  |  |  |  | * |  |
| R40 |  | * |  |  |  |  | R96 |  |  |  |  | * |  |
| R41 |  |  | * |  |  |  | R97 |  |  |  |  |  | * |
| R42 |  |  | * |  |  |  | R98 |  |  |  |  |  | * |
| R45 |  |  | * |  |  |  | R99 |  |  |  |  |  | * |
| R46 |  |  | * |  |  |  | R100 |  |  |  |  |  | * |
| R47 |  |  | * |  |  |  | R101 |  |  |  |  |  | * |
| R48 |  |  | * |  |  |  | R103 |  |  |  |  |  | * |
| R51 |  |  | * |  |  |  | R104 |  |  |  |  |  | * |
| R52 |  |  | * |  |  |  | R105 |  |  |  |  |  | * |
| R53 |  |  | * |  |  |  | R106 |  |  |  |  |  | * |
| R54 |  |  | * |  |  |  | R107 |  |  |  |  |  | * |
| R55 |  |  | * |  |  |  | R108 |  |  |  |  |  | * |
| R56 |  |  | * |  |  |  | R109 |  |  |  |  |  | * |
| R58 |  |  | * |  |  |  | R111 |  |  |  |  |  | * |
| R59 |  |  |  | * |  |  | R112 |  |  |  |  |  | * |
| R60 |  |  |  | * |  |  | R113 |  |  |  |  |  | * |
| R62 |  |  |  | * |  |  |  |  |  |  |  |  |  |

Table S7 The results of SIMCA model in the validation set when the significance level α = 0.1

| Sample - Class | 1 | 2 | 3 | 4 | 5 | 6 | Sample - Class | 1 | 2 | 3 | 4 | 5 | 6 |
| --- | --- | --- | --- | --- | --- | --- | --- | --- | --- | --- | --- | --- | --- |
| R1 | * |  |  |  |  |  | R49 |  |  | * |  |  |  |
| R2 | * |  |  |  |  |  | R50 |  |  | * |  |  |  |
| R4 | * |  |  |  |  |  | R57 |  |  | * |  |  |  |
| R9 | * |  |  |  |  |  | R61 |  |  |  | * |  |  |
| R10 | * |  |  |  |  |  | R64 |  |  |  | * |  |  |
| R12 | * |  |  |  |  |  | R65 |  |  |  | * |  |  |
| R13 | * |  |  |  |  |  | R66 |  |  |  | * |  |  |
| R15 | * |  |  |  |  |  | R71 |  |  |  | * |  |  |
| R18 | * |  |  |  |  |  | R73 |  |  |  | * |  |  |
| R19 | * |  |  |  |  |  | R75 |  |  |  | * |  |  |
| R20 | * |  |  |  |  |  | R82 |  |  |  |  | * |  |
| R23 |  | * |  |  |  |  | R85 |  |  |  |  | * |  |
| R24 |  | * |  |  |  |  | R87 |  |  |  |  | * |  |
| R26 |  | * |  |  |  |  | R88 |  |  |  |  | * |  |
| R27 |  | * |  |  |  |  | R94 |  |  |  |  | * |  |
| R31 |  | * |  |  |  |  | R95 |  |  |  |  | * |  |
| R36 |  | * |  |  |  |  | R102 |  |  |  |  |  | * |
| R39 |  | * |  |  |  |  | R110 |  |  |  |  |  | * |
| R43 |  |  | * |  |  |  | R114 |  |  |  |  |  | * |
| R44 |  |  | * |  |  |  |  |  |  |  |  |  |  |
